# Supplementary material
Source: Research Square preprint supplement (doi:10.21203/rs.3.rs-9117646/v1)
Supplement: Supplementary file 1 [file 9fc53ababc0549b13b8d3378.docx]

# **Interview guide**

**Community FGD: Interview Guides**

**Title:** Outcome Evaluation of Multimedia Intervention to Address Social Norms of FGM and Child Marriage (CM) in Central, Southwest and Southern Ethiopia

**Purpose**: To explore community norms, beliefs, and behaviors around FGM and Child Marriage (CM), and to assess perceptions of intervention efforts (especially media programs).

**Participants**: community residents with different social status; religious and community leaders; Stratified by gender, age; experiences associated to FGM/CM (Refer to sampling criteria)

**1. Introduction and Consent**

- Greet participants, explain purpose.
- Emphasize confidentiality and voluntary participation.
- Gain verbal consent.

**2. Knowledge and Understanding**

**Main Questions:**

- What do people in your community believe about FGM?
- What do people think about child marriage?

**Probes:**

- What are the benefits people mention? Can you give examples of these benefits from your locality?
- What are the harms? Can you give examples of these harms from your locality?
- Are people aware these practices are harmful or illegal?
- What are the common sources of information?

**3. Social and Cultural Norms**

**Main Questions:**

- Who usually decides if a girl is circumcised or married young?
- What happens when someone refuses to circumcise or marry off their daughter early?

**Probes:**

- Are these practices considered traditions or religious duties?
- What is said about families who break the norm?
- Do people fear community reactions?
- What are the impacts of families refusing to undergo FGM and CM? what kind? Why?
- What are the impacts of actively advocating against FGM and CM? in your community? Give live examples, if any?

**4. Gender Norms and Power Relations**

**Main Questions:**

- Do girls and women have a say in decisions around FGM or CM? why? why not?
- Who has the final word—mother, father, elders? Why?

**Probes:**

- What happens if a girl resists FGM or early marriage?
- Do boys face similar pressures or expectations?
- Are there examples of girls or families challenging these norms?

**5. Exposure to Interventions and Media**

**Main Questions:**

- Have you heard messages against FGM/CM in the last 12 months?
- Where did you hear these messages? Platforms?

**Probes:**

- What specific programs or messages do you remember?
- Do you listen to the PMC-E radio shows?
- What parts of the programs did you like/dislike?
- Did the messages lead to discussions in your household or community?

**6. Perceived Changes in Behavior or Attitudes**

**Main Questions:**

- Have people’s attitudes toward FGM or CM changed recently?
- Are there changes in actual practice?

**Probes:**

- What has led to these changes? (e.g., education, religion, health messaging)
- Do people act differently even if they don’t speak publicly about it?

**7. Recommendations**

**Main Questions:**

- What should be done to end FGM and CM?
- Who should lead these efforts?

**Probes:**

- What messages are most convincing?
- Should religious or traditional leaders be involved?
- What support would help parents say no to these practices?

**Multisector FGD Interview Guide**

# Title:

Outcome Evaluation of Multimedia Intervention to Address Social Norms of FGM and Child Marriage (CM) in Central, Southwest, and Southern Ethiopia

# Purpose:

To explore multisector perspectives on FGM and CM, understand experiences with prevention efforts, and assess exposure to and engagement with multimedia interventions.

# Participants:

Stakeholders from multiple sectors (Women and Social Affairs [WWSA], Education, Health Extension Program [HEP], Gender Focal Persons, Political and Security Delegates)

## Introduction and Consent

- Greet participants and thank them for joining.

- Explain the purpose: to understand stakeholder views and experiences related to FGM/CM, and to learn about the impact of media interventions.

- Reassure participants: responses are confidential, participation is voluntary, and they can skip any questions.

- Obtain verbal informed consent.

## Main questions

## 1. Sectoral Understanding and Experiences

Main Questions:

• From your sector's perspective, what are the prevailing views in your community around FGM and CM?

• What experiences has your office/sector had in addressing these practices?

Probes:

• What benefits or justifications do people in your area give for these practices?

• What harms have you encountered or documented?

• Are people generally aware that these practices are illegal or harmful?

• How do these issues typically come to the attention of your sector?

## 2. Decision-Making and Community Norms

Main Questions:

• In your experience, who influences decisions around FGM and CM in families?

• What challenges do families face if they reject these practices?

Probes:

• Are these decisions driven more by tradition, religion, or social pressure?

• How does your sector respond when cases are reported?

• What risks or stigma do families face for going against community norms?

## 3. Gender and Power Dynamics

Main Questions:

• To what extent do girls, mothers, or female teachers influence decisions about FGM or early marriage?

• Who typically holds decision-making power (father, elder, religious leader, etc.)?

Probes:

• Have you witnessed or heard about girls resisting FGM or CM?

• Are there similar expectations or pressures for boys?

• Can you share examples of families or individuals who have challenged these norms?

## 4. Exposure to Interventions and Media

Main Questions:

• Are you aware of any media programs or campaigns addressing FGM and CM in your area?

• Have you or your office interacted with or supported these efforts?

Probes:

• Which media platforms (radio, TV, posters, mobile campaigns, dramas) are common in your area?

• Do you recall any specific messages or programs (e.g., PMC-E radio shows)?

• What feedback have you heard from communities about these messages?

• Has your sector used these materials in outreach or awareness activities?

## 5. Perceived Impact and Change

Main Questions:

• Have you observed any changes in public attitudes or behaviors related to FGM and CM over the past year?

• How do you assess the contribution of media or other interventions to these changes?

Probes:

• Have you seen a reduction in cases reported or pressure to comply?

• Are people discussing these issues more openly?

• Even if people still practice FGM/CM, are they beginning to question them?

## 6. Challenges and Gaps in Multisector Coordination

Main Questions:

• What are the biggest challenges in working across sectors to address FGM and CM?

• What coordination mechanisms exist, and how effective are they?

Probes:

• Are there gaps in referral, enforcement, or follow-up?

• Are there policies in place that support your sector’s work? Are they being implemented?

## 7. Recommendations and Future Directions

Main Questions:

• What should be done to accelerate the abandonment of FGM and CM?

• What roles should different sectors play?

Probes:

• What types of messages are most persuasive for your community?

• Should religious, cultural, or political leaders be more involved? How?

• What support or resources would strengthen your sector’s ability to respond?

• What should be improved in media programming to make it more effective?

**KEY INFORMANT INTERVIEW (KII) GUIDE**

**Purpose**: To gather insights from health workers, educators/ change agents, advocate against FGM/CM, FGM performers; successful survivors of FGM/CM; Traumatic experiences; and women affairs

**1. Introduction and Consent**

- Explain purpose of the interview.
- Emphasize confidentiality.
- Seek consent to take notes or record.

**2. Background and Role**

**Main Questions:**

- What is your role in this community?
- Are you involved in work on FGM or CM?

**Probes:**

- Do people come to you for advice on these issues?
- Have you ever helped prevent a girl from being cut or married early?

**3. Perceptions and Community Beliefs and experiences**

**Main Questions:**

- How common are FGM and CM in this area?
- Why do people still practice them? What are the benefits of FGM? CM? What are negative consequences of practicing FGM? CM?
- Who performs the FGM? What do they benefit? What do the FGM performers feel and believe about FGM? Is there any unique characterstics they hold?

**Probes:**

- What reasons do families give?
- Do attitudes differ between older and younger generations?
- Are people aware of the law?
- What experiences you can share about success stories of survivors of FGM/CM? Explain the story of survivorship and success with examples- in terms of education and empowernment?
- What experiences you can share about harmful or traumatic stories of vicitims of FGM/CM? Explain the story of the victims and trauma with examples- in terms of early pregnayc, complications, economic and educational empowernment?

**4. Norms and Social Influence**

**Main Questions:**

- Who influences decisions about FGM and CM?
- Is it hard for families to go against the norm?
- What resistance one may face as advocate against against FGM? CM? what kind? From whom? Why?

**Probes:**

- Are there specific individuals or groups who pressure others?
- How are non-conforming families treated?

**5. Experience with Interventions**

**Main Questions:**

- Have you been involved in or observed any campaigns, community talks, or radio programs about FGM/CM?

**Probes:**

- Which programs seem to make an impact?
- What do you know about PMC-E’s radio shows?
- Do you think these efforts change behavior or only awareness?

**6. Institutional Support and Enforcement**

**Main Questions:**

- Are there services to support girls at risk of FGM or CM?
- Is the law enforced in your area?

**Probes:**

- Are there challenges in enforcing laws?
- Do girls or parents report pressure or abuse?
- Are schools or health posts doing any prevention work?

**7. Recommendations and Solutions**

**Main Questions:**

- What should be done to reduce FGM and CM?
- Who are the key actors in change?

**Probes:**

- What would make interventions more effective?
- How can communities be involved?
- What’s your role, and how could you be supported?
